# Supplementary material for: Preparation and antioxidant properties of tannic acid/copper ion nanozyme hybrid nanofibrous membranes
Source: Royal Society of Chemistry journal article supplement (doi:10.1039/d4ra05314a), 2024-01-01
Supplement: d4ra05314a1.pdf [file d4ra05314a1.pdf]

*Supplementary Information*

**Preparation and antioxidant properties of tannic  
acid/copper ion nanozyme hybrid nanofibrous membranes**

Qiao Wu<sup>a</sup>, Jingshu Xiao<sup>a</sup>, Hu Zhuang<sup>a</sup>, Fenghai Zhao<sup>a</sup>, Ruoxi Li<sup>a</sup>, Duntie Zhang<sup>a,\*</sup>

<sup>a</sup> China Tobacco Hubei Industrial LLC, Wuhan, Hubei, 430072, China

\* Corresponding authors: Duntie Zhang

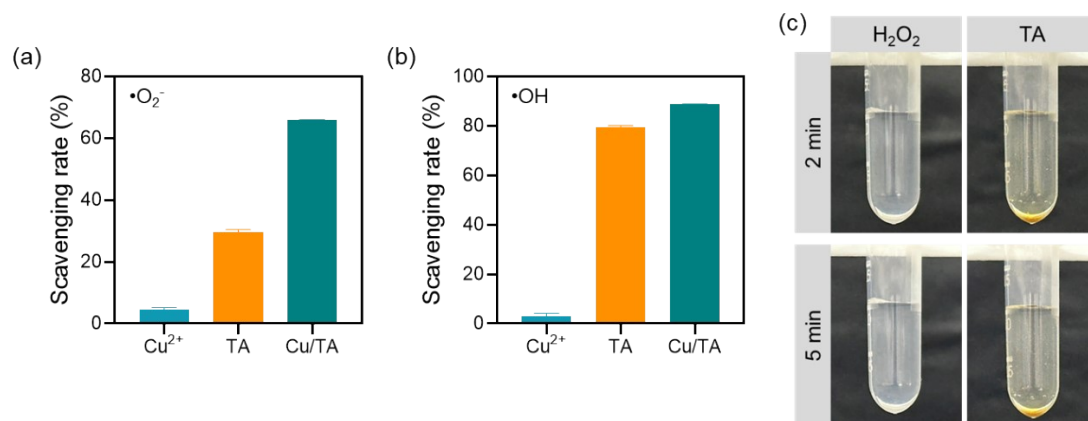

Fig. S1 Scavenging ability of different samples for (a)  $\bullet\text{O}_2^-$  and (b)  $\bullet\text{OH}$ . (c) Photographs of H<sub>2</sub>O<sub>2</sub> decomposing to produce O<sub>2</sub> in 5 min in the absence and presence of TA.

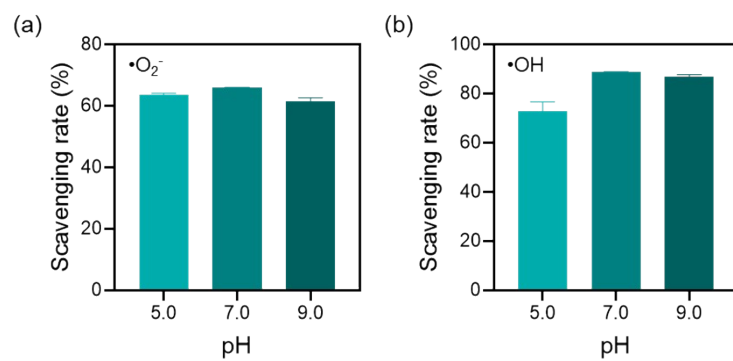

Fig. S2 Scavenging ability of Cu/TA nanozyme for (a)  $\bullet\text{O}_2^-$  and (b)  $\bullet\text{OH}$  at different pH.

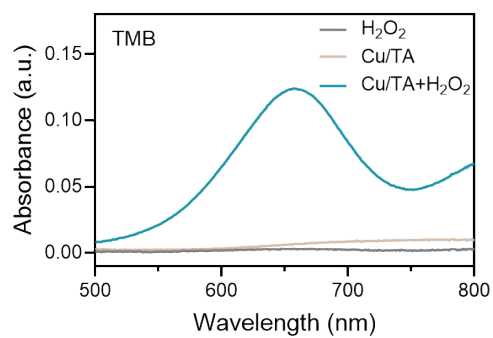

Fig. S3 Absorption curves of TMB reaction solutions.

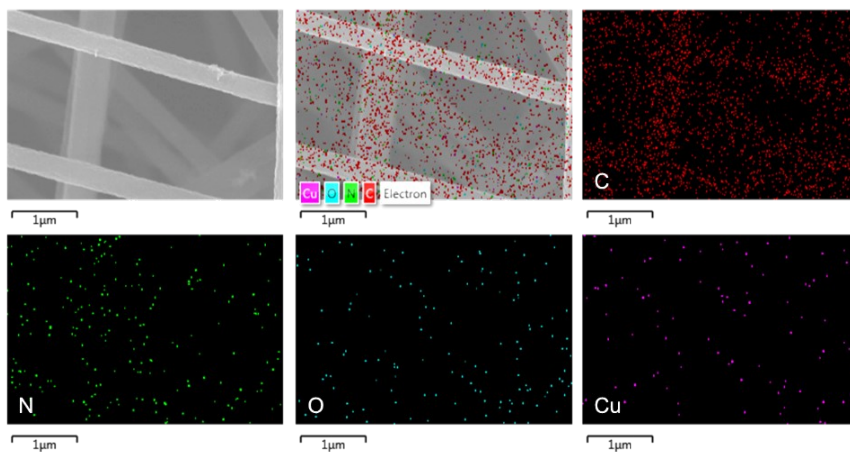

Fig. S4 EDS elemental analysis of CTP membrane.
